# Supplementary material
Source: PubMed Central journal article supplement (PMC3092728)
Supplement: supp_214.11.1902_JEB054643TableS1-S2.pdf [file supp_214.11.1902_JEB054643TableS1-S2.pdf]

Table S1. Summary of donor species

| Order            | Common name               | Species                         | No. cell lines | Species mass (g) | Maximum lifespan (years) |
|------------------|---------------------------|---------------------------------|----------------|------------------|--------------------------|
| Anseriformes     | Canada goose              | <i>Branta canadensis</i>        | 1              | 3200             | 42                       |
| Anseriformes     | Gadwall                   | <i>Anas strepera</i>            | 3              | 791              | 22                       |
| Anseriformes     | Mallard                   | <i>Anas platyrhynchos</i>       | 3              | 1048             | 29                       |
| Anseriformes     | Pintail                   | <i>Anas acuta</i>               | 3              | 721              | 27                       |
| Anseriformes     | Shoveler                  | <i>Anas clypeata</i>            | 4              | 613              | 20                       |
| Anseriformes     | Green winged teal         | <i>Anas carolinensis</i>        | 4              | 343.8            | 27                       |
| Anseriformes     | Wood duck                 | <i>Aix sponsa</i>               | 1              | 452.8            | 23                       |
| Apodiformes      | Ruby throated hummingbird | <i>Archilochus colubris</i>     | 9              | 3.1              | 9                        |
| Charadriiformes  | Killdeer                  | <i>Charadrius vociferus</i>     | 4              | 88               | 11                       |
| Charadriiformes  | Ring-billed gull          | <i>Larus delawarensis</i>       | 1              | 518.5            | 32                       |
| Charadriiformes  | Spotted sandpiper         | <i>Actitis macularius</i>       | 3              | 22.7             | 11                       |
| Columbiformes    | Mourning dove             | <i>Zenaida macroura</i>         | 15             | 119              | 31                       |
| Galliformes      | Pheasant                  | <i>Phasianus colchicus</i>      | 1              | 1095             | 27                       |
| Passeriformes    | Barn swallow              | <i>Hirundo rustica</i>          | 2              | 18.3             | 16                       |
| Passeriformes    | Carolina wren             | <i>Thryothorus ludovicianus</i> | 1              | 17.5             | 9                        |
| Passeriformes    | Gray catbird              | <i>Dumetella carolinensis</i>   | 3              | 34.5             | 18                       |
| Passeriformes    | Chipping sparrow          | <i>Spizella passerina</i>       | 5              | 12.2             | 12                       |
| Passeriformes    | Brown-headed cowbird      | <i>Molothrus ater</i>           | 8              | 38.1             | 17                       |
| Passeriformes    | American goldfinch        | <i>Spinus tristis</i>           | 1              | 12.8             | 13                       |
| Passeriformes    | Common grackle            | <i>Quiscalus quiscula</i>       | 2              | 111              | 23                       |
| Passeriformes    | Horned lark               | <i>Eremophila alpestris</i>     | 1              | 33.5             | 8                        |
| Passeriformes    | House finch               | <i>Carpodacus mexicanus</i>     | 2              | 21.4             | 12                       |
| Passeriformes    | House sparrow             | <i>Passer domesticus</i>        | 4              | 25.3             | 23                       |
| Passeriformes    | House wren                | <i>Troglodytes aedon</i>        | 1              | 9.7              | 9                        |
| Passeriformes    | White-breasted nuthatch   | <i>Sitta carolinensis</i>       | 2              | 20.5             | 10                       |
| Passeriformes    | Red-eyed vireo            | <i>Vireo olivaceus</i>          | 1              | 17               | 10                       |
| Passeriformes    | American robin            | <i>Turdus migratorius</i>       | 10             | 75.5             | 17                       |
| Passeriformes    | Song sparrow              | <i>Melospiza melodia</i>        | 5              | 34               | 12                       |
| Passeriformes    | Starling                  | <i>Sturnus vulgaris</i>         | 1              | 74               | 23                       |
| Passeriformes    | Tree swallow              | <i>Tachycineta bicolor</i>      | 2              | 19               | 12                       |
| Passeriformes    | Yellow warbler            | <i>Dendroica petechia</i>       | 2              | 9.8              | 11                       |
| Passeriformes    | Yellow-rumped warbler     | <i>Dendroica coronata</i>       | 1              | 12.5             | 7                        |
| Passeriformes    | Yellow-throated warbler   | <i>Dendroica dominica</i>       | 1              | 9.7              | 5                        |
| Piciformes       | Downy woodpecker          | <i>Picoides pubescens</i>       | 3              | 25.6             | 12                       |
| Struthioniformes | Ostrich                   | <i>Struthio camelus</i>         | 3              | 111000           | 50                       |

Table S2. Initial oxygen tension does not influence subsequent stress resistance

| Stressor                      | Least squares mean |                    | ANCOVA result |       |
|-------------------------------|--------------------|--------------------|---------------|-------|
|                               | 3% O <sub>2</sub>  | 21% O <sub>2</sub> | F             | P     |
| Cadmium                       | 45.6               | 47.9               | 0.04          | 0.85  |
| H <sub>2</sub> O <sub>2</sub> | 151                | 167                | 0.14          | 0.71  |
| Paraquat                      | 48.6               | 60.0               | 0.45          | 0.51  |
| MMS                           | 1.12               | 0.89               | 3.25          | 0.083 |
| UV                            | 926                | 845                | 0.02          | 0.88  |
| Thapsigargin                  | 10.8               | 13.4               | 1.39          | 0.25  |
| Tunicamycin                   | 31.2               | 33.4               | 0.26          | 0.61  |

MMS, methylmethane sulfonate.
